# Supplementary material for: A Rubik’s microfluidic cube
Source: PubMed Central journal article supplement (PMC8433458; doi:10.1038/s41378-020-0136-4), 2020-06-15
Supplement: 41378_2020_136_MOESM4_ESM.pdf [file 41378_2020_136_MOESM4_ESM.pdf]

## Supplementary Information

### **A Rubik's Microfluidic Cube**

*Xiaochen Lai<sup>a</sup>, Zhi Shi<sup>a</sup>, Zihua Pu<sup>a</sup>, Penghao Zhang<sup>a</sup>, Xingguo Zhang<sup>a</sup>,  
Haixia Yu<sup>b</sup>, Dachao Li<sup>a\*</sup>*

<sup>a</sup> State Key Laboratory of Precision Measurement Technology and Instruments,  
Tianjin University, Tianjin, 300072, China

\*E-mail: dchli@tju.edu.cn

<sup>b</sup> Tianjin Key Laboratory of Biomedical Detecting Techniques and Instruments,  
Tianjin University, Tianjin, 300072, China

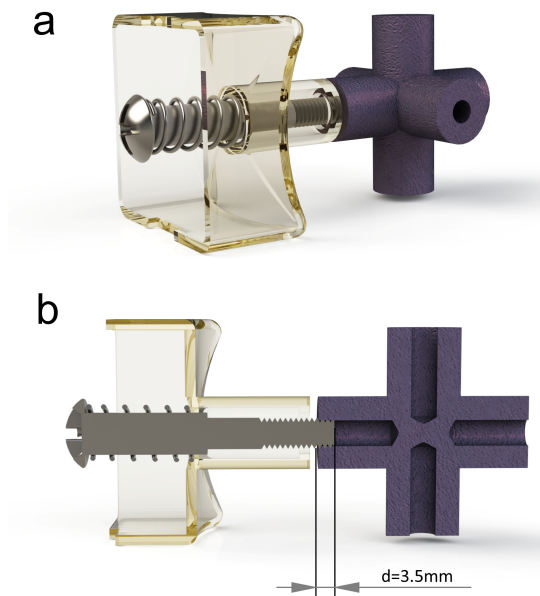

**Figure S1. a.** Illustration about how a central block is fixed to the cube block with a screw and a spring. **b.** Section view of **a** where the depth of the screw driven into the cube is 3.5 mm, ensuring smooth rotation and leakproof connection of microfluidic cube blocks.

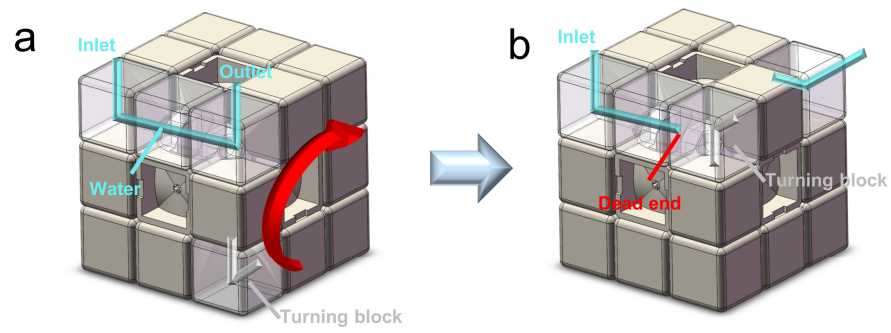

**Figure S2.** Experimental setup of the pressure resistance test of the microfluidic cube. **a.** At first, The microfluidic cube is configured to have 3 blocks: Inlet, straight channel and outlet. Water are injected into the cube to fill the channel. **b.** Afterwards, turn a turning corner block to replace the outlet block to form a dead end for the microchannel. Then, pressure generated by an air compressor and a pressure relief valve is applied to the inlet to verify the pressure resistance.

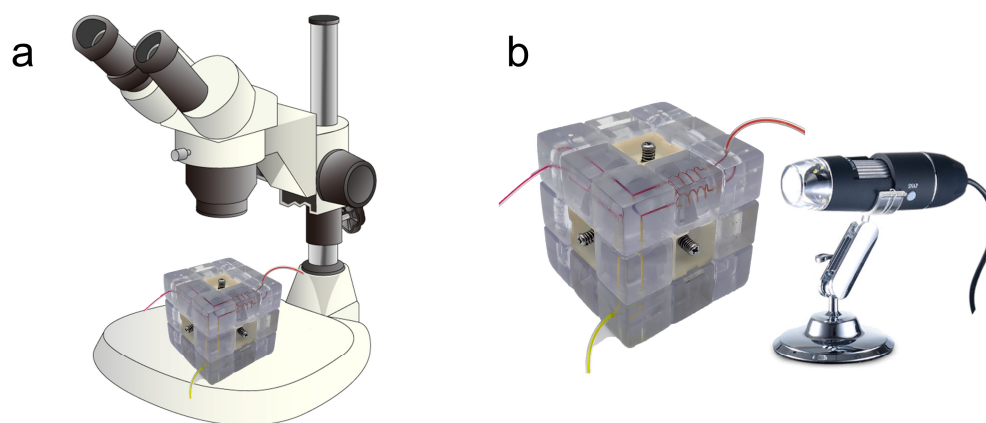

**Figure S3.** Illustration of current strategies to observe the microchannels in the microfluidic cube. **a.** Observe the top surface of the cube with a stereomicroscope. **b.** Observe the side surface of the cube with a desktop usb magnifier.

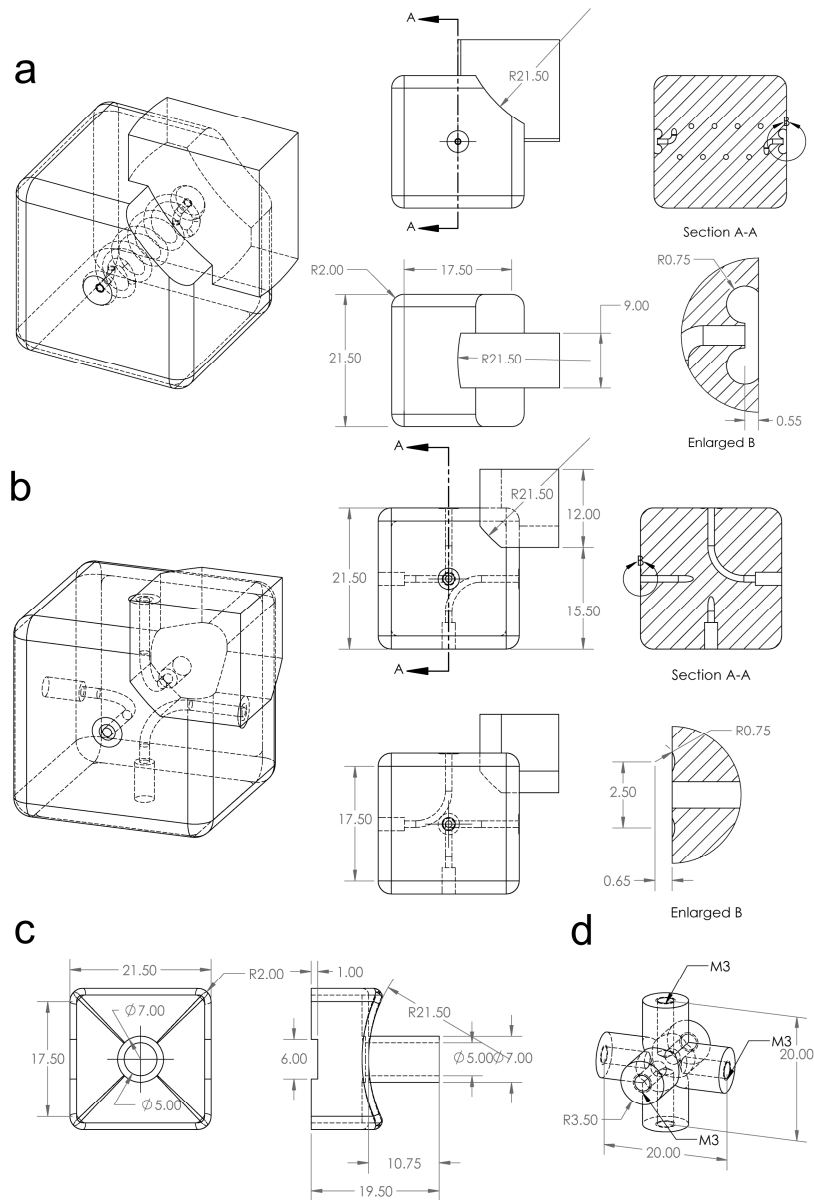

**Figure S4** Designed dimensions of the components of the microfluidic cube. **a.** An edge block with a spiral channel. Right bottom: enlarged view of the O-ring embedding torus concave. **b.** A corner block of a 3-way inlets/outlets. Right bottom: enlarged view of the O-ring fitting torus concave. **c.** A central block. **d.** The cube core. All values are in mm.

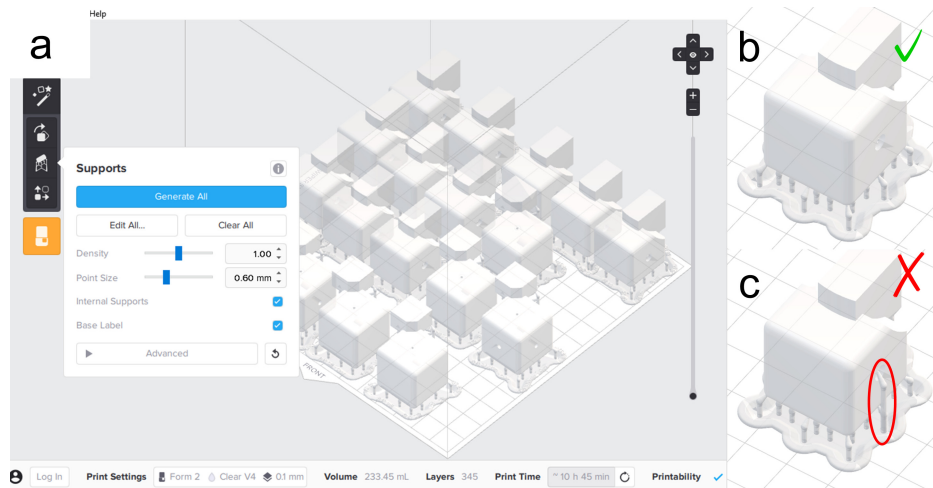

**Figure. S5** Adding supports for 3D printing. **a.** Orientation of edge and corner blocks. All blocks are oriented with an out face connecting the supports so that the models are printable without adding additional support to the O-ring convex. **b.** A right example of the supports. **c.** A wrong example of the supports. The support at the convex (in the red ellipse) will cause a lump in the convex after removal. In this case the O-ring will be unable to completely fit into the convex.
